# Supplementary material for: Undernutrition among Ethiopian adults living with HIV: a meta-analysis
Source: BMC Nutr. 2020 Apr 16;6:10. doi: 10.1186/s40795-020-00334-x (PMC7161140; doi:10.1186/s40795-020-00334-x)
Supplement: Supplementary file 1 — Additional file 1. Data abstraction tool. [file 40795_2020_334_MOESM1_ESM.xlsx]

## Sheet: Sheet1
Name of primary author	Year of study	Study Design	Stdy seting	Type of hospital	Participants age	Response rate(%)	Event	Sample size (N)	potential bisases in their methods
